# Supplementary material for: Increased CD34 in pancreatic islet negatively predict islet β-cell decrease in type1 diabetes model
Source: Front Physiol. 2022 Nov 18;13:1032774. doi: 10.3389/fphys.2022.1032774 (PMC9716098; doi:10.3389/fphys.2022.1032774)
Supplement: Supplementary file 1 [file Table2.XLSX]

## Sheet: Sheet1
Entry Name	Gene Name	Protein Name	Uniprot Identifier	Tissue Name	Tissue Synonym	Unnormalized Intensity	Maximum Normalized Intensity	Minimum Normalized Intensity	Avarage Normalized Intensity
CD34_MOUSE	Cd34	Hematopoietic progenitor cell antigen CD34	Q64314	somatosensory cortex	unknown	6.96	6.12	5.39	5.76
CD34_MOUSE	Cd34	Hematopoietic progenitor cell antigen CD34	Q64314	motor cortex	unknown	7.57	5.7	5.37	5.5
CD34_MOUSE	Cd34	Hematopoietic progenitor cell antigen CD34	Q64314	prefrontal cortex	brain	7.48	5.53	5.05	5.32
CD34_MOUSE	Cd34	Hematopoietic progenitor cell antigen CD34	Q64314	white adipose tissue	unknown	8.53	6.47	6.47	6.47
CD34_MOUSE	Cd34	Hematopoietic progenitor cell antigen CD34	Q64314	uterus	uterus	8.85	6.58	6.58	6.58
CD34_MOUSE	Cd34	Hematopoietic progenitor cell antigen CD34	Q64314	urinary bladder	urinary_bladder	8.61	6.29	6.29	6.29
CD34_MOUSE	Cd34	Hematopoietic progenitor cell antigen CD34	Q64314	trachea	unknown	8.44	6.35	6.35	6.35
CD34_MOUSE	Cd34	Hematopoietic progenitor cell antigen CD34	Q64314	tongue	unknown	8.41	6.11	6.11	6.11
CD34_MOUSE	Cd34	Hematopoietic progenitor cell antigen CD34	Q64314	thyroid gland	thyroid	8.75	6.59	6.59	6.59
CD34_MOUSE	Cd34	Hematopoietic progenitor cell antigen CD34	Q64314	thymus	unknown	9	6.47	6.47	6.47
CD34_MOUSE	Cd34	Hematopoietic progenitor cell antigen CD34	Q64314	thalamus	unknown	7.01	4.94	4.67	4.81
CD34_MOUSE	Cd34	Hematopoietic progenitor cell antigen CD34	Q64314	testis	testis	7	5.75	5.71	5.73
CD34_MOUSE	Cd34	Hematopoietic progenitor cell antigen CD34	Q64314	temporal lobe	unknown	7.89	5.45	5.45	5.45
CD34_MOUSE	Cd34	Hematopoietic progenitor cell antigen CD34	Q64314	corpus striatum	unknown	6.59	4.86	3.94	4.49
CD34_MOUSE	Cd34	Hematopoietic progenitor cell antigen CD34	Q64314	stomach	stomach	8.68	6.37	6.37	6.37
CD34_MOUSE	Cd34	Hematopoietic progenitor cell antigen CD34	Q64314	femur	unknown	8.42	6.09	6.09	6.09
CD34_MOUSE	Cd34	Hematopoietic progenitor cell antigen CD34	Q64314	spleen	spleen	8.12	5.71	5.71	5.71
CD34_MOUSE	Cd34	Hematopoietic progenitor cell antigen CD34	Q64314	spinal cord	spinal_cord	7.22	4.83	4.83	4.83
CD34_MOUSE	Cd34	Hematopoietic progenitor cell antigen CD34	Q64314	skin	skin	8.43	6.27	6.27	6.27
CD34_MOUSE	Cd34	Hematopoietic progenitor cell antigen CD34	Q64314	seminal vesicle	prostate	7.46	5.66	5.66	5.66
CD34_MOUSE	Cd34	Hematopoietic progenitor cell antigen CD34	Q64314	salivary gland	salivary_gland	8.58	6.3	6.3	6.3
CD34_MOUSE	Cd34	Hematopoietic progenitor cell antigen CD34	Q64314	prostate gland	prostate	8.34	5.88	5.88	5.88
CD34_MOUSE	Cd34	Hematopoietic progenitor cell antigen CD34	Q64314	skeletal muscle	unknown	8.74	6.55	6.55	6.55
CD34_MOUSE	Cd34	Hematopoietic progenitor cell antigen CD34	Q64314	pancreas	pancreas	6.26	5.66	4.48	5.07
CD34_MOUSE	Cd34	Hematopoietic progenitor cell antigen CD34	Q64314	ovary	ovary	8.64	6.46	6.46	6.46
CD34_MOUSE	Cd34	Hematopoietic progenitor cell antigen CD34	Q64314	optic nerve	unknown	7.2	5.58	5.12	5.36
CD34_MOUSE	Cd34	Hematopoietic progenitor cell antigen CD34	Q64314	olfactory bulb	unknown	6.68	5.05	4.1	4.47
CD34_MOUSE	Cd34	Hematopoietic progenitor cell antigen CD34	Q64314	esophagus	esophagus	8.09	5.99	5.99	5.99
CD34_MOUSE	Cd34	Hematopoietic progenitor cell antigen CD34	Q64314	mammary gland	unknown	8.32	6.35	6.35	6.35
CD34_MOUSE	Cd34	Hematopoietic progenitor cell antigen CD34	Q64314	lymph node	lymph_node	8.58	6.3	6.3	6.3
CD34_MOUSE	Cd34	Hematopoietic progenitor cell antigen CD34	Q64314	lung	lung	7.84	6.78	6.51	6.64
CD34_MOUSE	Cd34	Hematopoietic progenitor cell antigen CD34	Q64314	liver	liver	7.34	5.2	5.2	5.2
CD34_MOUSE	Cd34	Hematopoietic progenitor cell antigen CD34	Q64314	large intestine	unknown	8.37	6.39	6.39	6.39
CD34_MOUSE	Cd34	Hematopoietic progenitor cell antigen CD34	Q64314	hindbrain	unknown	7.76	5.33	5.33	5.33
CD34_MOUSE	Cd34	Hematopoietic progenitor cell antigen CD34	Q64314	kidney	kidney	7.48	6.58	5.17	5.87
CD34_MOUSE	Cd34	Hematopoietic progenitor cell antigen CD34	Q64314	small intestine	unknown	8.88	6.52	6.52	6.52
CD34_MOUSE	Cd34	Hematopoietic progenitor cell antigen CD34	Q64314	corpus callosum	unknown	7.17	5.51	5.02	5.26
CD34_MOUSE	Cd34	Hematopoietic progenitor cell antigen CD34	Q64314	hippocampus	unknown	7.25	5.27	4.6	4.93
CD34_MOUSE	Cd34	Hematopoietic progenitor cell antigen CD34	Q64314	heart	heart	7.19	5.93	5.72	5.83
CD34_MOUSE	Cd34	Hematopoietic progenitor cell antigen CD34	Q64314	frontal lobe	unknown	8.43	6.06	6.06	6.06
CD34_MOUSE	Cd34	Hematopoietic progenitor cell antigen CD34	Q64314	eye	unknown	8.11	5.97	5.97	5.97
CD34_MOUSE	Cd34	Hematopoietic progenitor cell antigen CD34	Q64314	epididymis	unknown	8.38	6.16	6.16	6.16
CD34_MOUSE	Cd34	Hematopoietic progenitor cell antigen CD34	Q64314	duodenum	unknown	8.16	5.74	5.74	5.74
CD34_MOUSE	Cd34	Hematopoietic progenitor cell antigen CD34	Q64314	occipital lobe	unknown	8.76	6.3	6.3	6.3
CD34_MOUSE	Cd34	Hematopoietic progenitor cell antigen CD34	Q64314	vagina	unknown	8.86	6.53	6.53	6.53
CD34_MOUSE	Cd34	Hematopoietic progenitor cell antigen CD34	Q64314	cerebellum	unknown	7.21	5.19	4.63	4.8
CD34_MOUSE	Cd34	Hematopoietic progenitor cell antigen CD34	Q64314	brown adipose tissue	unknown	8.08	5.78	5.78	5.78
CD34_MOUSE	Cd34	Hematopoietic progenitor cell antigen CD34	Q64314	brain stem	unknown	6.6	4.9	4.22	4.56
CD34_MOUSE	Cd34	Hematopoietic progenitor cell antigen CD34	Q64314	adrenal gland	adrenal	8.55	6.37	6.37	6.37
CD34_MOUSE	Cd34	Hematopoietic progenitor cell antigen CD34	Q64314	brain	brain	7.31	5.46	4.85	5.18
