# Supplementary material for: Increased CD34 in pancreatic islet negatively predict islet β-cell decrease in type1 diabetes model
Source: Front Physiol. 2022 Nov 18;13:1032774. doi: 10.3389/fphys.2022.1032774 (PMC9716098; doi:10.3389/fphys.2022.1032774)
Supplement: Supplementary file 3 [file Table1.XLSX]

## Sheet: Sheet1
Entry Name	Gene Name	Protein Name	Uniprot Identifier	Tissue Name	Tissue Synonym	Unnormalized Intensity	Maximum Normalized Intensity	Minimum Normalized Intensity	Avarage Normalized Intensity
CD34_HUMAN	CD34	Hematopoietic progenitor cell antigen CD34	P28906	proximal fluid (coronary sinus)	proximal_fluid	5.57	4.43	4.43	4.43
CD34_HUMAN	CD34	Hematopoietic progenitor cell antigen CD34	P28906	carotid atherosclerotic plaque	unknown	7.21	5.23	5.1	5.17
CD34_HUMAN	CD34	Hematopoietic progenitor cell antigen CD34	P28906	oral epithelium	oral_cavity	7.12	5.92	5.92	5.92
CD34_HUMAN	CD34	Hematopoietic progenitor cell antigen CD34	P28906	adipose tissue	unknown	7.74	5.52	5.52	5.52
CD34_HUMAN	CD34	Hematopoietic progenitor cell antigen CD34	P28906	uterus	uterus	5.7	5.71	5.67	5.69
CD34_HUMAN	CD34	Hematopoietic progenitor cell antigen CD34	P28906	uterine endometrium	unknown	7.44	5.26	5.26	5.26
CD34_HUMAN	CD34	Hematopoietic progenitor cell antigen CD34	P28906	uterine cervix	cervix_uterine	7.24	5.96	5.96	5.96
CD34_HUMAN	CD34	Hematopoietic progenitor cell antigen CD34	P28906	urinary bladder	urinary_bladder	6.71	5.96	4.8	5.38
CD34_HUMAN	CD34	Hematopoietic progenitor cell antigen CD34	P28906	tonsil	tonsils	6.71	5.26	4.75	5.01
CD34_HUMAN	CD34	Hematopoietic progenitor cell antigen CD34	P28906	thyroid gland	thyroid	7.02	5.66	5.66	5.66
CD34_HUMAN	CD34	Hematopoietic progenitor cell antigen CD34	P28906	testis	testis	6.38	6.5	4.03	5.46
CD34_HUMAN	CD34	Hematopoietic progenitor cell antigen CD34	P28906	stomach	stomach	7	5.61	5.26	5.44
CD34_HUMAN	CD34	Hematopoietic progenitor cell antigen CD34	P28906	spleen	spleen	6.97	5.45	5.11	5.31
CD34_HUMAN	CD34	Hematopoietic progenitor cell antigen CD34	P28906	spinal cord	spinal_cord	5.2	4.12	4.12	4.12
CD34_HUMAN	CD34	Hematopoietic progenitor cell antigen CD34	P28906	smooth muscle	unknown	7.75	5.65	5.65	5.65
CD34_HUMAN	CD34	Hematopoietic progenitor cell antigen CD34	P28906	skin	skin	5.44	4.47	4.47	4.47
CD34_HUMAN	CD34	Hematopoietic progenitor cell antigen CD34	P28906	seminal vesicle	prostate	7.21	5.91	5.91	5.91
CD34_HUMAN	CD34	Hematopoietic progenitor cell antigen CD34	P28906	salivary gland	salivary_gland	7.21	5.5	5.43	5.46
CD34_HUMAN	CD34	Hematopoietic progenitor cell antigen CD34	P28906	saliva	saliva	4.61	4.56	4.56	4.56
CD34_HUMAN	CD34	Hematopoietic progenitor cell antigen CD34	P28906	rectum	rectum	6.27	5.72	3.8	4.96
CD34_HUMAN	CD34	Hematopoietic progenitor cell antigen CD34	P28906	prostate gland	prostate	6.62	5.41	5.1	5.27
CD34_HUMAN	CD34	Hematopoietic progenitor cell antigen CD34	P28906	placenta	placenta	6.81	6.48	4.64	5.43
CD34_HUMAN	CD34	Hematopoietic progenitor cell antigen CD34	P28906	pancreas	pancreas	5.92	5.71	4.76	5.08
CD34_HUMAN	CD34	Hematopoietic progenitor cell antigen CD34	P28906	oviduct	unknown	7.31	5.32	5.32	5.32
CD34_HUMAN	CD34	Hematopoietic progenitor cell antigen CD34	P28906	ovary	ovary	6.48	6.11	4.89	5.34
CD34_HUMAN	CD34	Hematopoietic progenitor cell antigen CD34	P28906	osteosarcoma cell	bone	4.78	4.55	4.55	4.55
CD34_HUMAN	CD34	Hematopoietic progenitor cell antigen CD34	P28906	esophagus	esophagus	6.28	5.56	4.84	5.22
CD34_HUMAN	CD34	Hematopoietic progenitor cell antigen CD34	P28906	myometrium	myometrium	5.75	6.07	4.78	5.46
CD34_HUMAN	CD34	Hematopoietic progenitor cell antigen CD34	P28906	lymph node	lymph_node	6.8	5.55	5.02	5.28
CD34_HUMAN	CD34	Hematopoietic progenitor cell antigen CD34	P28906	lung	lung	6.12	6.02	4.39	5.19
CD34_HUMAN	CD34	Hematopoietic progenitor cell antigen CD34	P28906	liver	liver	5.62	4.5	4.04	4.3
CD34_HUMAN	CD34	Hematopoietic progenitor cell antigen CD34	P28906	kidney	kidney	6.31	5.43	4.58	5.01
CD34_HUMAN	CD34	Hematopoietic progenitor cell antigen CD34	P28906	small intestine	unknown	6.42	4.07	4.07	4.07
CD34_HUMAN	CD34	Hematopoietic progenitor cell antigen CD34	P28906	heart	heart	6.39	5.67	4.49	5.05
CD34_HUMAN	CD34	Hematopoietic progenitor cell antigen CD34	P28906	gut	gut	6.33	5.65	5.65	5.65
CD34_HUMAN	CD34	Hematopoietic progenitor cell antigen CD34	P28906	gall bladder	gall_bladder	6.46	5.49	4.13	4.97
CD34_HUMAN	CD34	Hematopoietic progenitor cell antigen CD34	P28906	adipocyte	adipose	6.11	5.89	4	5.26
CD34_HUMAN	CD34	Hematopoietic progenitor cell antigen CD34	P28906	duodenum	unknown	7.81	5.16	5.16	5.16
CD34_HUMAN	CD34	Hematopoietic progenitor cell antigen CD34	P28906	colon	colon	7	5.75	5.35	5.59
CD34_HUMAN	CD34	Hematopoietic progenitor cell antigen CD34	P28906	cerebral cortex	brain	5.46	5	5	5
CD34_HUMAN	CD34	Hematopoietic progenitor cell antigen CD34	P28906	cardia	cardia	6.2	5.62	5.62	5.62
CD34_HUMAN	CD34	Hematopoietic progenitor cell antigen CD34	P28906	breast cancer cell	breast	6.59	5.48	4.03	4.51
CD34_HUMAN	CD34	Hematopoietic progenitor cell antigen CD34	P28906	brain	brain	6.38	3.74	3.74	3.74
CD34_HUMAN	CD34	Hematopoietic progenitor cell antigen CD34	P28906	blood platelet	circulatory_system	6.01	4.46	4.46	4.46
CD34_HUMAN	CD34	Hematopoietic progenitor cell antigen CD34	P28906	adrenal gland	adrenal	6.44	5.59	4.46	5.2
CD34_HUMAN	CD34	Hematopoietic progenitor cell antigen CD34	P28906	vermiform appendix	unknown	6.82	5.21	5.21	5.21
